# Supplementary material for: High-strength carbon nanotube/carbon composite fibers via chemical vapor infiltration
Source: Royal Society of Chemistry journal article supplement (doi:10.1039/c6nr06479e), 2016-01-01
Supplement: c6nr06479e1.pdf [file c6nr06479e1.pdf]

## Supporting Information

### High-Strength Carbon Nanotube/Carbon Composite Fibers by Chemical Vapor Infiltration

*Jaeeun Lee,<sup>1,†</sup> Teawon Kim,<sup>2,†</sup> Yeonsu Jung,<sup>3</sup> Kihoon Jung,<sup>1</sup> Junbeom Park,<sup>1,2</sup> Dong-Myeong Lee,<sup>1,4</sup> Hyeon Su Jeong,<sup>1</sup> Jun Yeon Hwang,<sup>1</sup> Chong Rae Park,<sup>3</sup> Kun-Hong Lee,<sup>2,\*</sup> and Seung Min Kim<sup>1,\*</sup>*

<sup>1</sup>Institute of Advanced Composite Materials, Korea Institute of Science and Technology, 92 Chudong-ro, Bongdong-eup, Wanju-gun, Jeonbuk 55324, South Korea

<sup>2</sup>Department of Chemical Engineering, Pohang University of Science & Technology, 77 Cheongam-ro, Nam-gu, Pohang, Gyeongbuk 37673, South Korea

<sup>3</sup>Carbon Nanomaterials Design Laboratory, Research Institute of Advanced Materials, and Department of Materials Science and Engineering, Seoul National University, Seoul 151-744, South Korea

<sup>4</sup>Department of Chemistry, Chonbuk National University, Baekje-daero 567, Deokjingu, Jeonju, Jeonbuk, 54896, South Korea

†These authors contributed equally.

---

\*Corresponding author.

E-mail address: ce20047@postech.ac.kr (K. –H. Lee), seungmin.kim@kist.re.kr (S. M. Kim)

# 1. Pressure equilibrium constants of decomposition of various hydrocarbons

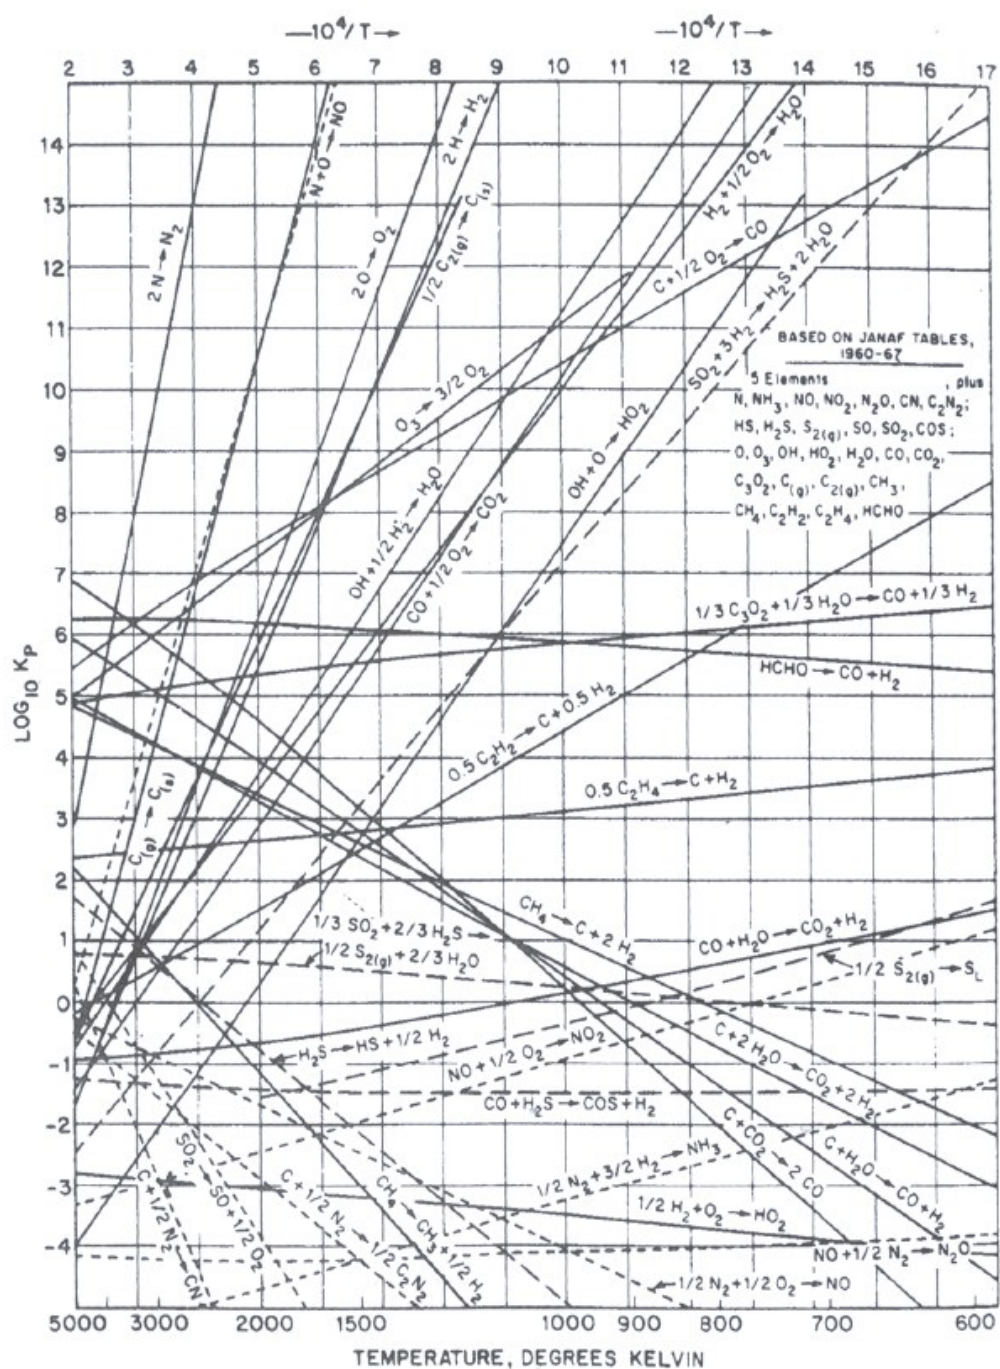

Fig S1. Pressure equilibrium constants of various chemical reactions with respect to temperature.<sup>1</sup>

## 2. Calculation of Reynolds number

When the flow rate was  $3700 \text{ cm}^3$ , the Reynolds number is

*Reynolds number in the tube*

$$\begin{aligned} &= \frac{\rho v d}{\mu} = \frac{v d}{\nu} = \frac{Q d}{A \nu} = \frac{3700 \text{ cm}^3 \text{min}^{-1} \times 10^{-6} \text{ m}^3 \text{cm}^{-3} \times \frac{1}{60} \text{min}}{117.8 \times 10^{-6} \text{ m}^2 \text{s}^{-1} \times \pi \times (3 \times 10^{-2} \text{ m})^2} \\ &= 11 \end{aligned}$$

Where  $\rho$  is the density of the gas,  $v$  is the flow velocity,  $d$  is the diameter of the tube,  $\mu$  is the viscosity of the gas,  $\nu$  is the kinematic viscosity,  $Q$  is the flow rate, and  $A$  is the cross-sectional area of the tube.

### 3. Cross sections of CNT/C composite fibers

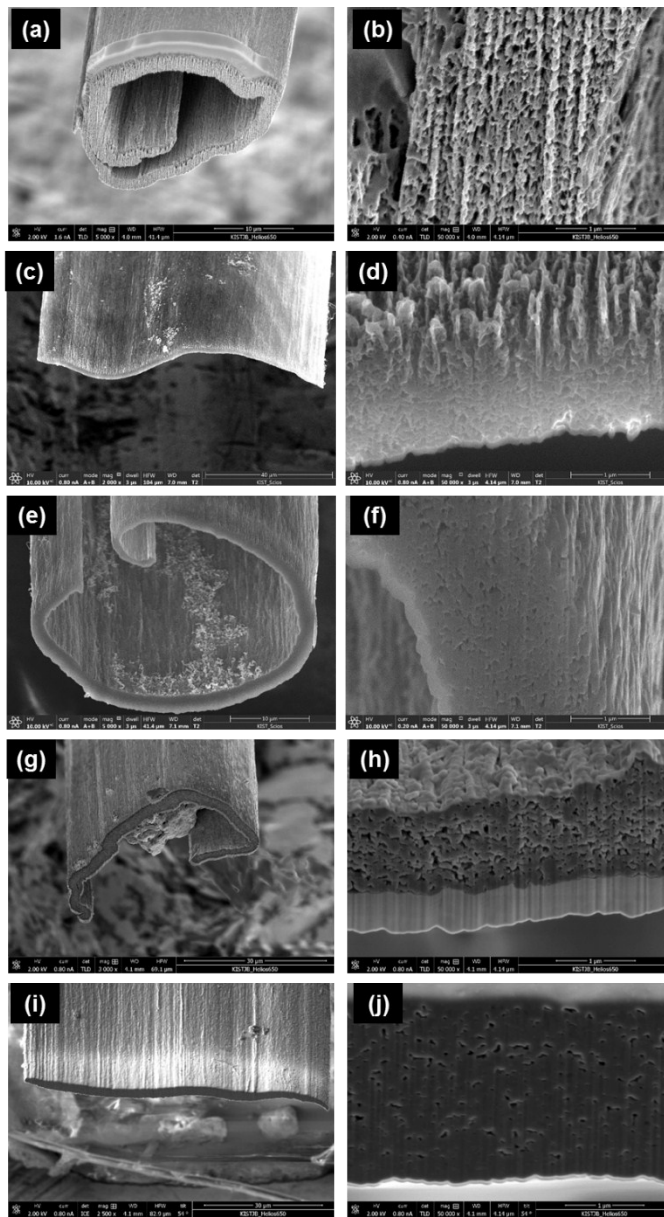

Fig. S2. Cross-sectional SEM images of (a)-(b) pristine CNT yarn, CNT yarn after CVI process (c)-(d) at 700 °C for 1 hour, (e)-(f) at 700 °C for 5 hours, (g)-(h) at 650 °C for 5 hours, and (i)-(j) at 750 °C for 5 hours

## Reference

1. Modell, M.; Reid, R. C., *Thermodynamics and Its Applications*. Prentice-Hall: Upper Saddle River, N.J., 1983.
